# Supplementary material for: A Squaramide-Based Organocatalyst as a Novel Versatile Chiral Solvating Agent for Carboxylic Acids
Source: MDPI journal article supplement (doi:10.3390/molecules29102389), 2024-05-19
Supplement: s1 [file s1]

# A squaramide-based organocatalyst as a novel versatile chiral solvating agent for carboxylic acids

Fabio Spiaggia <sup>1,\*</sup>, Gloria Uccello Barretta <sup>1,\*</sup>, Anna Iuliano <sup>1</sup>, Carlo Baldassari <sup>1</sup>, Federica Aiello <sup>2</sup>, and Federica Balzano <sup>1</sup>

<sup>1</sup> Department of Chemistry and Industrial Chemistry, University of Pisa, Via G. Moruzzi 13, 56124 Pisa, Italy; anna.iuliano@unipi.it (A.I.); c.baldassari@studenti.unipi.it (C.B.); federica.balzano@unipi.it (F.B.)

<sup>2</sup> National Research Council, Institute for Chemical and Physical Processes (CNR-IPCF), Via G. Moruzzi 1, 56124 Pisa, Italy; federica.aiello@cnr.it

\* correspondence: f.spiaggia@studenti.unipi.it (F.S.); gloria.uccello.barretta@unipi.it (G.U.B.)

## Table of contents

**Figure S1.** Spectral region of the <sup>1</sup>H NMR (600 MHz, CDCl<sub>3</sub>, 25 °C) spectrum of compound **1** (10 mM) in equimolar CSA/**1**/DABCO mixture, including DNB resonances. Enantiomeric composition is 40% L- and 60% D-**1**.

**Figure S2.** Spectral region of <sup>1</sup>H NMR (600 MHz, CDCl<sub>3</sub>, 25 °C) spectra involving amide nuclei of substrate **4** in 1:2 mixtures of CSA/**4** with: a) [CSA]=10 mM; b) [CSA]=0.7 mM.

**Figure S3.** Spectral region of <sup>1</sup>H NMR (600 MHz, CDCl<sub>3</sub>, 25 °C) spectra involving amide nuclei of substrate **7** in 1:2 mixtures of CSA/**7** with: a) [CSA]=10 mM; b) [CSA]=5 mM; c) [CSA]=2.5 mM; d) [CSA]=1.25 mM.

**Figure S4.** Spectral region of <sup>1</sup>H NMR (600 MHz, CDCl<sub>3</sub>, 25 °C) spectra involving chiral methine of substrate **9** in mixtures of CSA/**9** ([CSA]=5 mM) at the following CSA/substrate molar ratios: a) 1:2; b) 1:3; c) 1:4.

**Figure S5.** Spectral region of <sup>1</sup>H NMR (600 MHz, CDCl<sub>3</sub>, 25 °C) spectra involving chiral methine of substrate **10** in mixtures of CSA/**10** ([CSA]=5 mM) at the following CSA/substrate molar ratios: a) 1:2; b) 1:3; c) 1:4.

**Figure S6.** Spectral region of <sup>1</sup>H NMR (600 MHz, CDCl<sub>3</sub>, 25 °C) spectra involving chiral methine of substrate **11** in mixtures of CSA/**11** ([CSA]=5 mM) at the following CSA/substrate molar ratios: a) 1:2; b) 1:3; c) 1:4.

**Figure S7.** Spectral region of the <sup>1</sup>H NMR (600 MHz, CDCl<sub>3</sub>, 25 °C) spectrum, including the chiral methine proton of substrate **9** in the presence of CSA (5 mM) at the stoichiometric ratio CSA/**9** 1:3.

**Table S1.** <sup>1</sup>H NMR (600 MHz, CDCl<sub>3</sub>, 25 °C) nonequivalences ( $\Delta\Delta\delta$ , ppm) for selected resonances of racemic mixtures of substrates **15-20** in the presence of CSA **I** at different concentrations and molar ratios.

**Figure S8.** Spectral region of the <sup>1</sup>H NMR (600 MHz, CDCl<sub>3</sub>, 25 °C) spectra, including the chiral methine of substrate **16** (a) and one of the two diastereotopic methylene protons of substrate **17** (b) in the presence of the CSA (5 mM) at CSA/substrate stoichiometric ratio of 1:2.

**Figure S9.** Spectral regions of <sup>1</sup>H NMR (600 MHz, CDCl<sub>3</sub>, 25 °C) spectra, including the chiral methine (left) and methyl (right) protons of racemic mixtures of substrate **18** in the presence of the CSA (5 mM) at the following CSA/substrate stoichiometric ratios: a) 1:1; b) 1:2; c) 1:3; d) 1:4.

**Table S2.** <sup>1</sup>H NMR (600 MHz, CDCl<sub>3</sub>, 25 °C) nonequivalences ( $\Delta\Delta\delta$ , ppm) for selected resonances of racemic mixtures of substrates **21-24** in the presence of CSA **I** at different concentrations and molar ratios.

**Figure S10.** Spectral region of the <sup>1</sup>H NMR (600 MHz, CDCl<sub>3</sub>, 25 °C) spectrum including the chiral methine proton of substrate **22** in the presence of CSA (5 mM) at equimolar ratio.

**Figure S11.** <sup>1</sup>H NMR (600 MHz, CDCl<sub>3</sub>, 25 °C) spectrum of **9/I** mixture at the composition of 1:3 ([CSA] = 5 mM) (a) and 1D ROESY (600 MHz, CDCl<sub>3</sub>, 25 °C, mixing time = 500 ms) spectra of the same mixture corresponding to: b) *ortho*-CH of substrate **9**; c) CH of substrate **9**; d) CH<sub>3</sub> of squaramide **I**. Protons involved in intermolecular ROE effects are indicated in the spectra.

**Figure S12.**  $^1\text{H}$  NMR (600 MHz, 40 mM,  $\text{DMSO-d}_6$  + 2 equiv of TFA, 25 °C) spectrum of compound **I**.

**Figure S13.**  $^{13}\text{C}$  NMR (150 MHz, 40 mM,  $\text{DMSO-d}_6$  + 2 equiv of TFA, 25 °C) spectrum of compound **I**. \* Indicate resonances belonging to TFA.

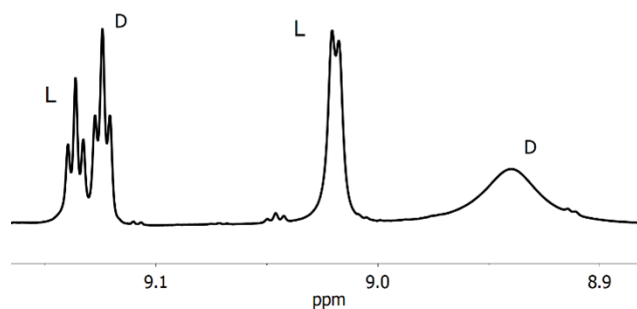

**Figure S1.** Spectral region of the  $^1\text{H}$  NMR (600 MHz,  $\text{CDCl}_3$ , 25  $^\circ\text{C}$ ) spectrum of compound **1** (10 mM) in equimolar CSA/**1**/DABCO mixture, including DNB resonances. Enantiomeric composition is 40% L- and 60% D-**1**.

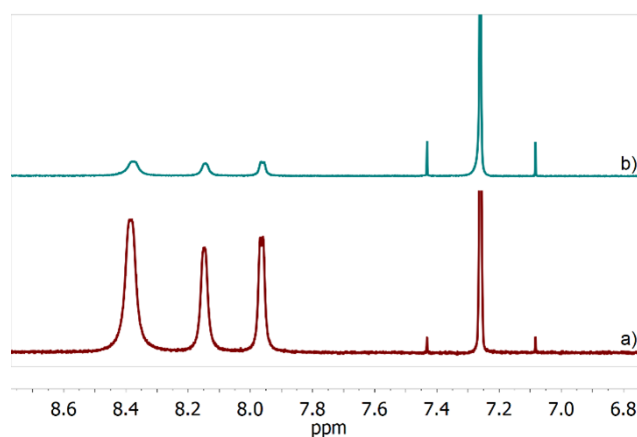

**Figure S2.** Spectral region of  $^1\text{H}$  NMR (600 MHz,  $\text{CDCl}_3$ , 25  $^\circ\text{C}$ ) spectra involving amide nuclei of substrate **4** in 1:2 mixtures of CSA/**4** with: a) [CSA]=10 mM; b) [CSA]=0.7 mM.

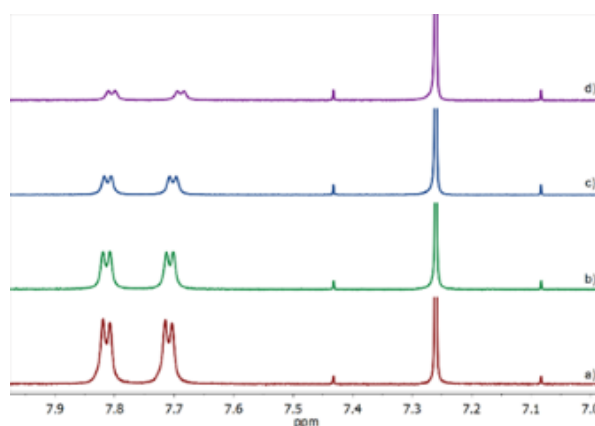

**Figure S3.** Spectral region of  $^1\text{H}$  NMR (600 MHz,  $\text{CDCl}_3$ , 25  $^\circ\text{C}$ ) spectra involving amide nuclei of substrate **7** in 1:2 mixtures of CSA/**7** with: a) [CSA]=10 mM; b) [CSA]=5 mM; c) [CSA]=2.5 mM; d) [CSA]=1.25 mM.

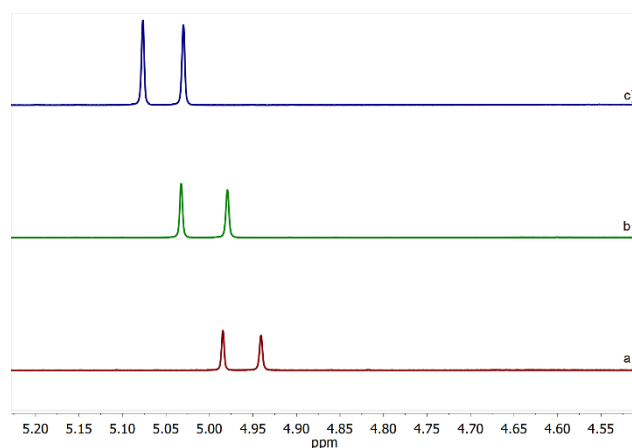

**Figure S4.** Spectral region of  $^1\text{H}$  NMR (600 MHz,  $\text{CDCl}_3$ , 25  $^\circ\text{C}$ ) spectra involving chiral methine of substrate **9** in mixtures of CSA/**9** ( $[\text{CSA}]=5\text{ mM}$ ) at the following CSA/substrate molar ratios: a) 1:2; b) 1:3; c) 1:4.

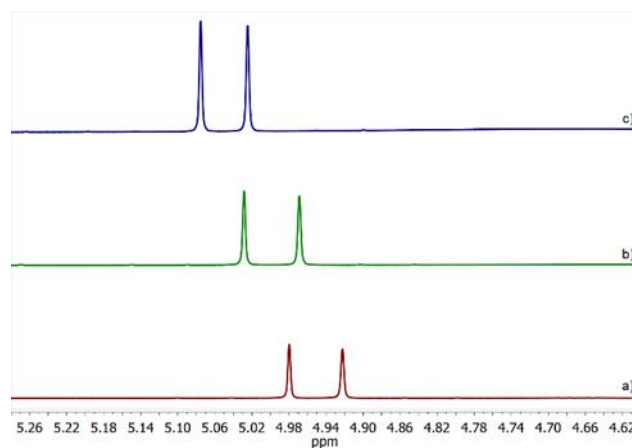

**Figure S5.** Spectral region of  $^1\text{H}$  NMR (600 MHz,  $\text{CDCl}_3$ , 25  $^\circ\text{C}$ ) spectra involving chiral methine of substrate **10** in mixtures of CSA/**10** ( $[\text{CSA}]=5\text{ mM}$ ) at the following CSA/substrate molar ratios: a) 1:2; b) 1:3; c) 1:4.

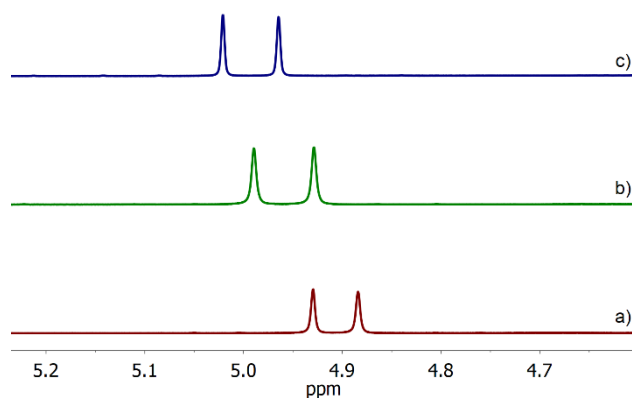

**Figure S6.** Spectral region of  $^1\text{H}$  NMR (600 MHz,  $\text{CDCl}_3$ , 25  $^\circ\text{C}$ ) spectra involving chiral methine of substrate **11** in mixtures of CSA/**11** ( $[\text{CSA}]=5\text{ mM}$ ) at the following CSA/substrate molar ratios: a) 1:2; b) 1:3; c) 1:4.

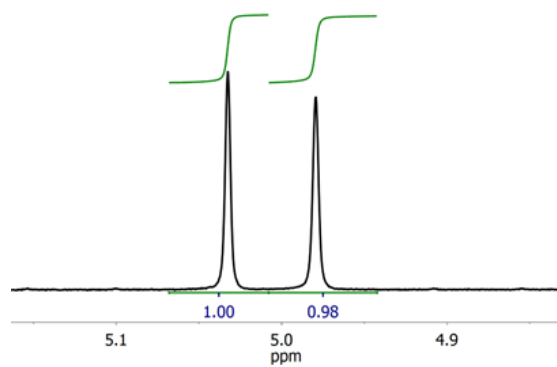

**Figure S7.** Spectral region of the  $^1\text{H}$  NMR (600 MHz,  $\text{CDCl}_3$ , 25  $^\circ\text{C}$ ) spectrum, including the chiral methine proton of substrate **9** in the presence of CSA (5 mM) at the stoichiometric ratio CSA/**9** 1:3.

**Table S1.**  $^1\text{H}$  NMR (600 MHz,  $\text{CDCl}_3$ , 25 °C) nonequivalences ( $\Delta\Delta\delta$ , ppm) for selected resonances of racemic mixtures of substrates **15-20** in the presence of CSA **I** at different concentrations and molar ratios.

| Substrate | CSA/Substrate | Concentrations                 | $\Delta\Delta\delta$ (ppm)                                                                                                                           |
|-----------|---------------|--------------------------------|------------------------------------------------------------------------------------------------------------------------------------------------------|
| <b>15</b> | 1:1           | CSA: 5 mM<br>Substrate: 5 mM   | CH: 0.007<br>CH <sub>3</sub> : 0.001                                                                                                                 |
|           | 1:2           | CSA: 5 mM<br>Substrate: 10 mM  | CH: 0.015<br>CH <sub>3</sub> : 0.003                                                                                                                 |
|           | 1:3           | CSA: 5 mM<br>Substrate: 15 mM  | CH: 0.005<br>CH <sub>3</sub> : 0.001                                                                                                                 |
|           | 1:4           | CSA: 5 mM<br>Substrate: 20 mM  | CH: 0.001                                                                                                                                            |
|           | 1:2           | CSA: 10 mM<br>Substrate: 20 mM | CH: 0.019<br>CH <sub>3</sub> : 0.003                                                                                                                 |
|           | 1:2           | CSA: 20 mM<br>Substrate: 40 mM | CH: 0.023<br>CH <sub>3</sub> : 0.003                                                                                                                 |
|           | 1:2           | CSA: 5 mM<br>Substrate: 10 mM  | CH: 0.130<br>Ar-CHO: 0.007; Ar-CHm: 0.005; Ar-CHp: 0.003                                                                                             |
|           | 1:3           | CSA: 5 mM<br>Substrate: 15 mM  | CH: 0.089<br>Ar-CHm: 0.002                                                                                                                           |
| <b>16</b> | 1:4           | CSA: 5 mM<br>Substrate: 20 mM  | CH: 0.070                                                                                                                                            |
|           | 1:1           | CSA: 5 mM<br>Substrate: 5 mM   | One of the diastereotopic protons of CH <sub>2</sub> : 0.030<br>Ar-CHO: 0.026                                                                        |
|           | 1:2           | CSA: 5 mM<br>Substrate: 10 mM  | CH: 0.013<br>One of the diastereotopic protons of CH <sub>2</sub> : 0.076<br>Ar-CHO: 0.017<br>COOH: 0.548*<br>CH: 0.311*<br>CH <sub>2</sub> : 0.421* |
|           | 1:3           | CSA: 5 mM<br>Substrate: 15 mM  | CH: 0.006<br>One of the diastereotopic protons of CH <sub>2</sub> : 0.052                                                                            |
| <b>17</b> | 1:1           | CSA: 5 mM<br>Substrate: 5 mM   | CH: 0.007<br>CH <sub>3</sub> (propyl fragment): 0<br>CH <sub>3</sub> (isopropyl fragment): 0.003                                                     |
|           | 1:2           | CSA: 5 mM<br>Substrate: 10 mM  | CH: 0.012<br>CH <sub>3</sub> (propyl fragment): 0.003<br>CH <sub>3</sub> (isopropyl fragment): 0.002                                                 |
|           | 1:3           | CSA: 5 mM<br>Substrate: 15 mM  | CH: 0.012<br>CH <sub>3</sub> (propyl fragment): 0.003<br>CH <sub>3</sub> (isopropyl fragment): 0                                                     |
|           | 1:4           | CSA: 5 mM<br>Substrate: 20 mM  | CH: 0.009<br>CH <sub>3</sub> (propyl fragment): 0.003                                                                                                |
|           | 1:2           | CSA: 5 mM<br>Substrate: 10 mM  | CH: 0.003<br>CH <sub>3</sub> : 0.010                                                                                                                 |
| <b>19</b> | 1:3           | CSA: 5 mM<br>Substrate: 15 mM  | CH: 0.005<br>CH <sub>3</sub> : 0.009                                                                                                                 |
|           | 1:4           | CSA: 5 mM<br>Substrate: 20 mM  | CH: 0.006<br>CH <sub>3</sub> : 0.008                                                                                                                 |
|           | 1:5           | CSA: 5 mM<br>Substrate: 25 mM  | CH: 0.005<br>CH <sub>3</sub> : 0.007                                                                                                                 |
|           | 1:4           | CSA: 10 mM<br>Substrate: 40 mM | CH: 0.010<br>CH <sub>3</sub> : 0.008                                                                                                                 |
|           | 1:2           | CSA: 5 mM<br>Substrate: 10 mM  | CH: 0.003<br>CH <sub>3</sub> : 0.010                                                                                                                 |
|           | 1:3           | CSA: 5 mM<br>Substrate: 15 mM  | CH: 0.005<br>CH <sub>3</sub> : 0.009                                                                                                                 |
| <b>20</b> | 1:4           | CSA: 5 mM<br>Substrate: 20 mM  | CH: 0.006<br>CH <sub>3</sub> : 0.008                                                                                                                 |
|           | 1:5           | CSA: 5 mM<br>Substrate: 25 mM  | CH: 0.005<br>CH <sub>3</sub> : 0.007                                                                                                                 |
|           | 1:4           | CSA: 10 mM<br>Substrate: 40 mM | CH: 0.010<br>CH <sub>3</sub> : 0.008                                                                                                                 |
|           | 1:2           | CSA: 5 mM<br>Substrate: 10 mM  | CH: 0.003<br>CH <sub>3</sub> : 0.010                                                                                                                 |

\* $^{13}\text{C}$  NMR (150 MHz,  $\text{CDCl}_3$ , 25 °C) nonequivalences ( $\Delta\Delta\delta$ , ppm).

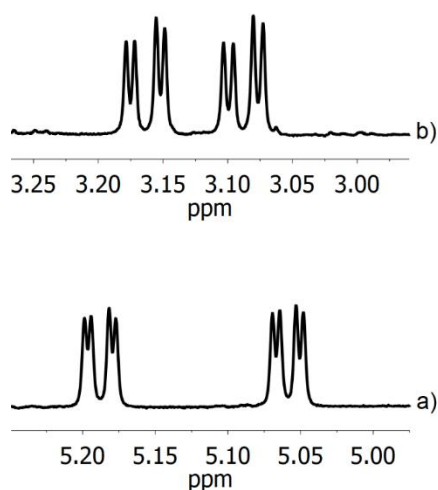

**Figure S8.** Spectral region of the  $^1\text{H}$  NMR (600 MHz,  $\text{CDCl}_3$ , 25  $^\circ\text{C}$ ) spectra, including the chiral methine of substrate **16** (a) and one of the two diastereotopic methylene protons of substrate **17** (b) in the presence of the CSA (5 mM) at CSA/substrate stoichiometric ratio of 1:2.

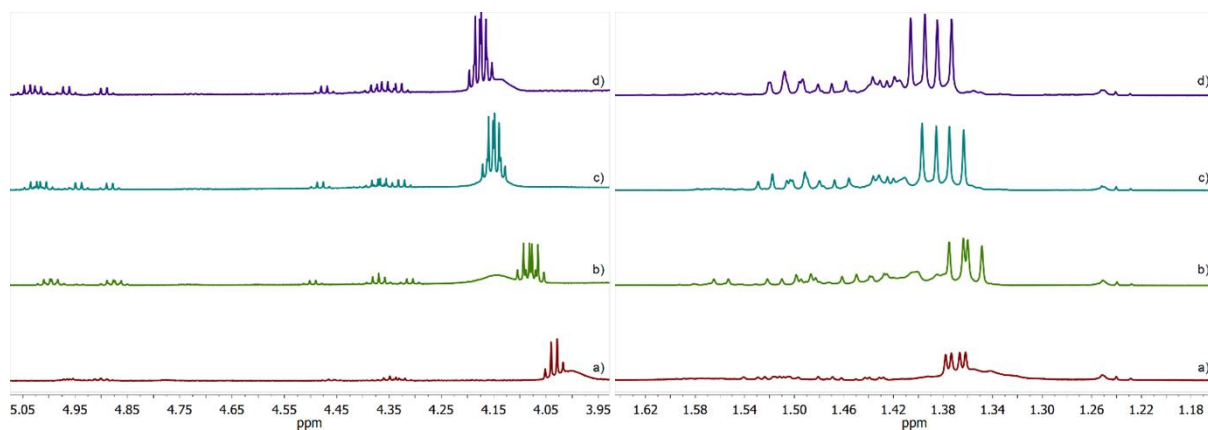

**Figure S9.** Spectral regions of  $^1\text{H}$  NMR (600 MHz,  $\text{CDCl}_3$ , 25  $^\circ\text{C}$ ) spectra, including the chiral methine (left) and methyl (right) protons of racemic mixtures of substrate **18** in the presence of the CSA (5 mM) at the following CSA/substrate stoichiometric ratios: a) 1:1; b) 1:2; c) 1:3; d) 1:4.

**Table S2.**  $^1\text{H}$  NMR (600 MHz,  $\text{CDCl}_3$ , 25  $^\circ\text{C}$ ) nonequivalences ( $\Delta\Delta\delta$ , ppm) for selected resonances of racemic mixtures of substrates **21-24** in the presence of CSA **I** at different concentrations and molar ratios.

| Substrate | CSA/Substrate | Concentrations                 | $\Delta\Delta\delta$ (ppm)                                                                                                                       |
|-----------|---------------|--------------------------------|--------------------------------------------------------------------------------------------------------------------------------------------------|
| <b>21</b> | 1:1           | CSA: 5 mM<br>Substrate: 5 mM   | $\text{CH}_3$ (main chain): 0.004<br>$\text{CH}_3$ (bound to CH): 0.007                                                                          |
|           | 1:1           | CSA: 10 mM<br>Substrate: 10 mM | $\text{CH}_3$ (main chain): 0.004<br>$\text{CH}_3$ (bound to CH): 0.008                                                                          |
|           | 1:2           | CSA: 5 mM<br>Substrate: 10 mM  | $\text{CH}_3$ (main chain): 0.003<br>$\text{CH}_3$ (bound to CH): 0.004                                                                          |
|           | 1:3           | CSA: 5 mM<br>Substrate: 15 mM  | $\text{CH}_3$ (main chain): 0.002<br>$\text{CH}_3$ (bound to CH): 0.003                                                                          |
|           | 1:1           | CSA: 5 mM<br>Substrate: 5 mM   | CH: 0.069<br>$\text{CH}_3$ (Ar): 0.012<br>$\text{CH}_3$ (Aliphatic chain): 0.012<br>CH( <i>meta</i> to $\text{CH}_3$ (Ar)): 0.026                |
| <b>22</b> | 1:2           | CSA: 5 mM<br>Substrate: 10 mM  | CH: superimposed signals<br>$\text{CH}_3$ (Ar): 0.002<br>$\text{CH}_3$ (Aliphatic chain): 0.002<br>CH( <i>meta</i> to $\text{CH}_3$ (Ar)): 0.009 |
|           | 1:3           | CSA: 5 mM<br>Substrate: 15 mM  | CH: superimposed signals<br>$\text{CH}_3$ (Aliphatic chain): 0.006<br>CH( <i>meta</i> to $\text{CH}_3$ (Ar)): 0.004                              |
|           | 1:1           | CSA: 5 mM<br>Substrate: 5 mM   | $\text{CH}_3$ (a): 0.006<br>$\text{CH}_3$ (b): 0.007                                                                                             |
| <b>23</b> | 1:2           | CSA: 5 mM<br>Substrate: 10 mM  | $\text{CH}_3$ (a): 0.007<br>$\text{CH}_3$ (b): 0.003                                                                                             |
|           | 1:3           | CSA: 5 mM<br>Substrate: 15 mM  | $\text{CH}_3$ (a): 0.006                                                                                                                         |
|           | 1:1           | CSA: 5 mM<br>Substrate: 5 mM   | CH: 0.025<br>Ar-CHO: 0.007; Ar-CHm: 0.003; Ar-CHp: 0.006                                                                                         |
| <b>24</b> | 1:2           | CSA: 5 mM<br>Substrate: 10 mM  | CH: 0.026<br>Ar-CHO: 0.007; Ar-CHm: 0.003; Ar-CHp: 0.004                                                                                         |
|           | 1:3           | CSA: 5 mM<br>Substrate: 15 mM  | CH: 0.025<br>Ar-CHO: 0.006; Ar-CHm: 0.003; Ar-CHp: 0.003                                                                                         |
|           | 1:4           | CSA: 5 mM<br>Substrate: 20 mM  | CH: 0.010<br>Ar-CHO: 0.005; Ar-CHm: 0.002; Ar-CHp: 0.003                                                                                         |
|           | 1:5           | CSA: 5 mM<br>Substrate: 25 mM  | CH: 0.009<br>Ar-CHO: 0.005; Ar-CHm: 0.002; Ar-CHp: 0.003                                                                                         |
|           | 1:6           | CSA: 5 mM<br>Substrate: 30 mM  | CH: 0.006                                                                                                                                        |

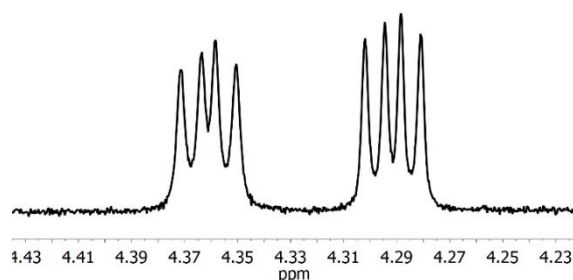

**Figure S10.** Spectral region of the  $^1\text{H}$  NMR (600 MHz,  $\text{CDCl}_3$ , 25  $^\circ\text{C}$ ) spectrum including the chiral methine proton of substrate **22** in the presence of CSA (5 mM) at equimolar ratio.



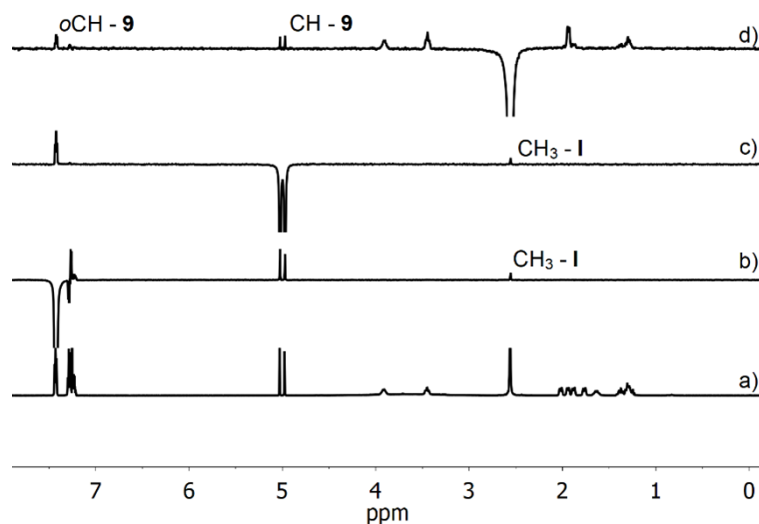

**Figure S11.**  $^1\text{H}$  NMR (600 MHz,  $\text{CDCl}_3$ , 25 °C) spectrum of **9/I** mixture at the composition of 1:3 ( $[\text{CSA}] = 5 \text{ mM}$ ) (a) and 1D ROESY (600 MHz,  $\text{CDCl}_3$ , 25 °C, mixing time = 500 ms) spectra of the same mixture corresponding to: b) *ortho*-CH of substrate **9**; c) CH of substrate **9**; d)  $\text{CH}_3$  of squaramide **I**. Protons involved in intermolecular ROE effects are indicated in the spectra.

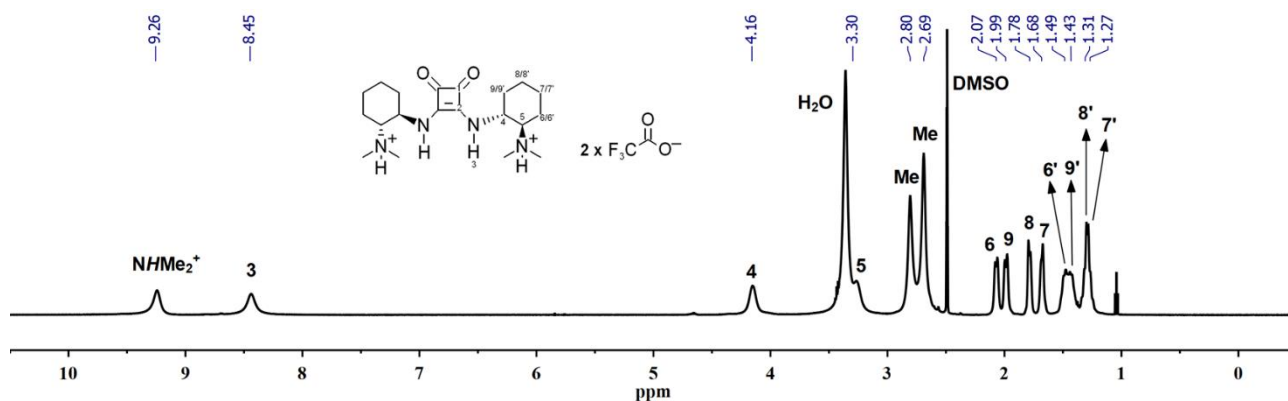

**Figure S12.**  $^1\text{H}$  NMR (600 MHz, 40 mM,  $\text{DMSO-d}_6 + 2 \text{ equiv of TFA}$ , 25 °C) spectrum of compound **I**. The apex indicates the axial proton.

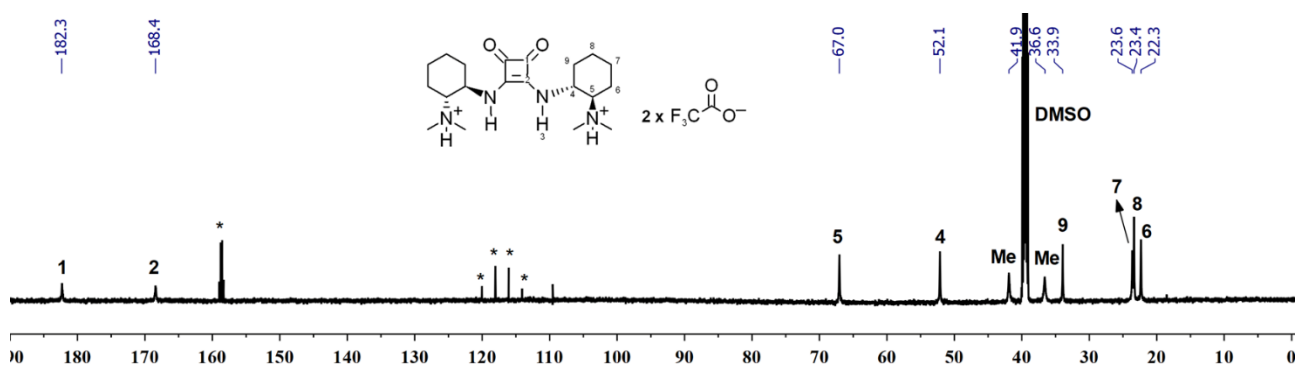

**Figure S13.**  $^{13}\text{C}$  NMR (150 MHz, 40 mM,  $\text{DMSO-d}_6 + 2 \text{ equiv of TFA}$ , 25 °C) spectrum of compound **I**. \* Indicate resonances belonging to TFA.
